# Supplementary material for: Complementary amphiphilic ribonucleotides confined into nanostructured environments
Source: Royal Society of Chemistry journal article supplement (doi:10.1039/c001781g), 2010-01-01

## Supplementary Material

### Complementary Amphiphilic Ribonucleotides Confined into Nanostructured Environments

*R. Angelico, L. Ambrosone, A. Ceglie, I. Losito, G. De Zio and F. Palmisano*

**Figure S1.** MS/MS spectrum (Collisional Energy: 35%) and product ion assignments for the [M-H]<sup>-</sup> ion of the tri-alkylated derivative of UMP ( $m/z$  876.5), detected after 118 days in reaction mixtures involving only UMP.

Square brackets indicate that R or R' groups can be linked (through the starred carbon atom) either to the Uracyl N<sub>3</sub> atom or to one of the two OH groups arising from tautomerization of -NH-C=O to -N=C-OH.

The product ion compatible with contemporary alkylation of both ribose OH groups was excluded from regioisomeric ions having  $m/z$  691.3, since no further MS/MS signal confirmed that possibility. See Ref. 5 for further details on fragments already observed in the MS/MS spectrum of bi-alkylated UMP.

**Figure S2.** MS/MS spectrum (Collisional Energy: 35%) and product ion assignments for the [M-H]<sup>-</sup> ion of the tri-alkylated derivative of AMP ( $m/z$  899.3), detected after 118 days in reaction mixtures involving only AMP.

Note that:

- 1) the ion with  $m/z$  579.2 has the same structure proposed in Figure S1 (R corresponds to R<sub>1</sub> in this case);
- 2) double alkylation on the NH<sub>2</sub> group, hypothesized for the fragment ion with  $m/z$  687.3, is the only reasonable possibility for double alkylation on the adenine ring and was observed for the tri-alkylated AMP derivative but never for the bi-alkylated one (see Ref. 5). In this case the linkage between a hydroxy-dodecyl moiety and the adenine N<sub>1</sub> atom (compatible also with fragments at  $m/z$  502.5 and 332.4), is likely formed during fragmentation, as a result of hydroxy-dodecyl migration from an alkylated OH on ribose to the adenine N<sub>1</sub> atom, concomitant with ribose detachment;
- 3) alternative structures for fragment ions at  $m/z$  634.5, 502.5 and 332.4, having two hydroxyl-dodecyl groups on the adenine NH<sub>2</sub> cannot be excluded, although they are less likely than those reported;
- 4) only in the case of adenine NH<sub>2</sub> group the nucleophilic attack can occur also to the more hindered carbon atom of the DE epoxidic ring (thus leading to a linkage with a R<sub>2</sub> group). See Ref. 5 for further details on this aspect and on fragmentations already observed in the MS/MS spectrum of bi-alkylated AMP (e.g. the presence of a CH<sub>3</sub> group on an alkylation site, involving the loss of n-undecanal from a previously linked R<sub>1</sub> group).

**Figure S1**

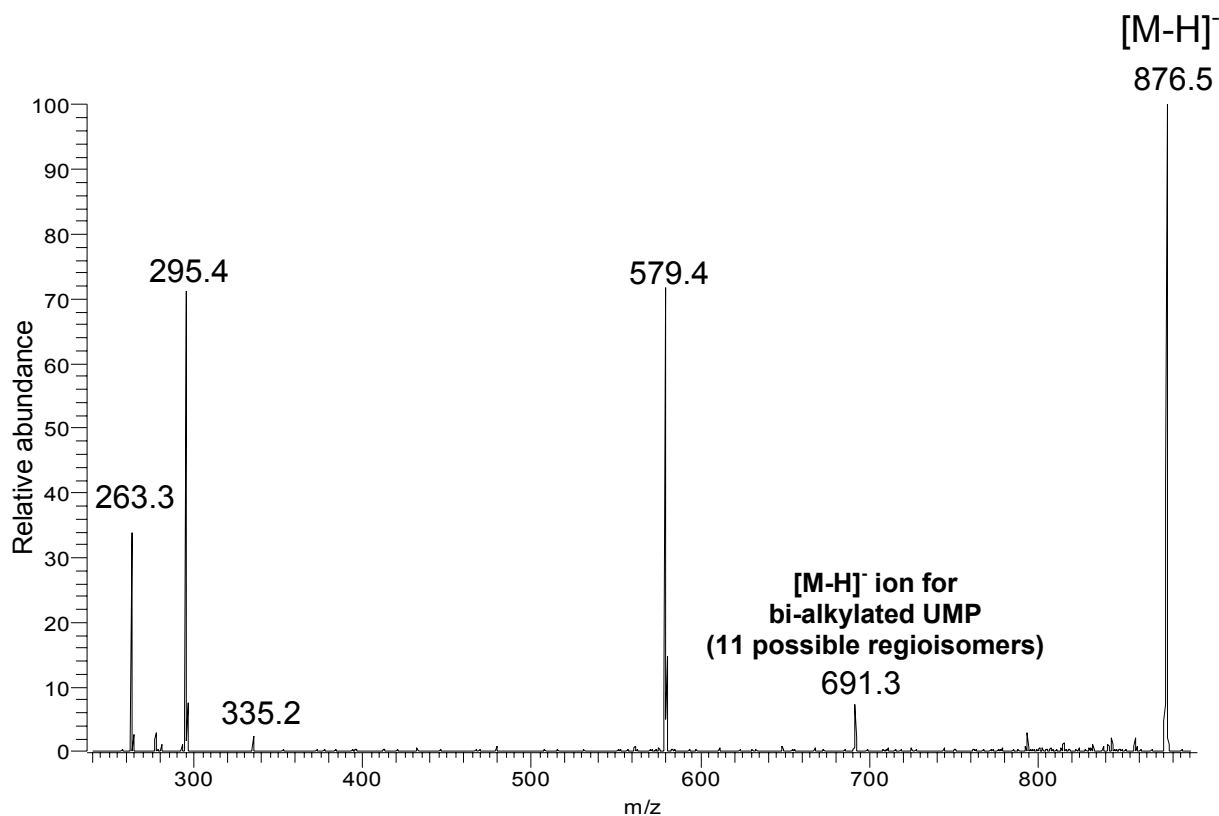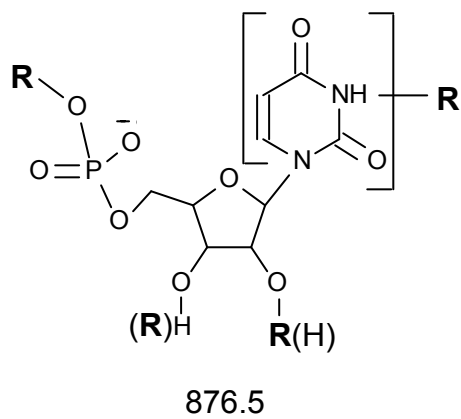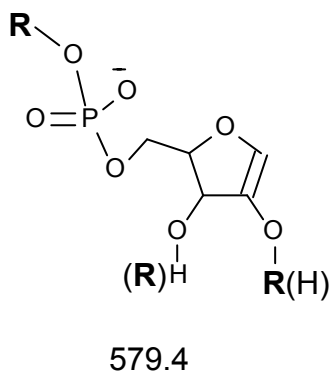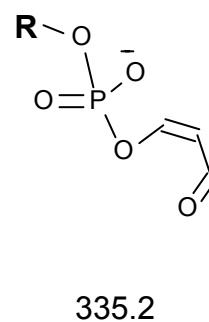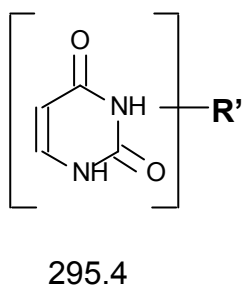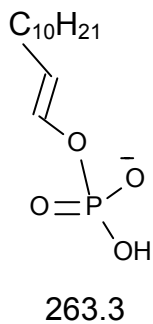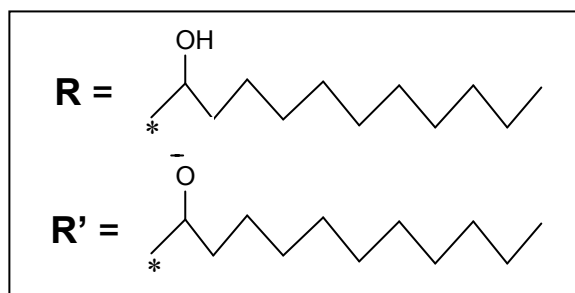

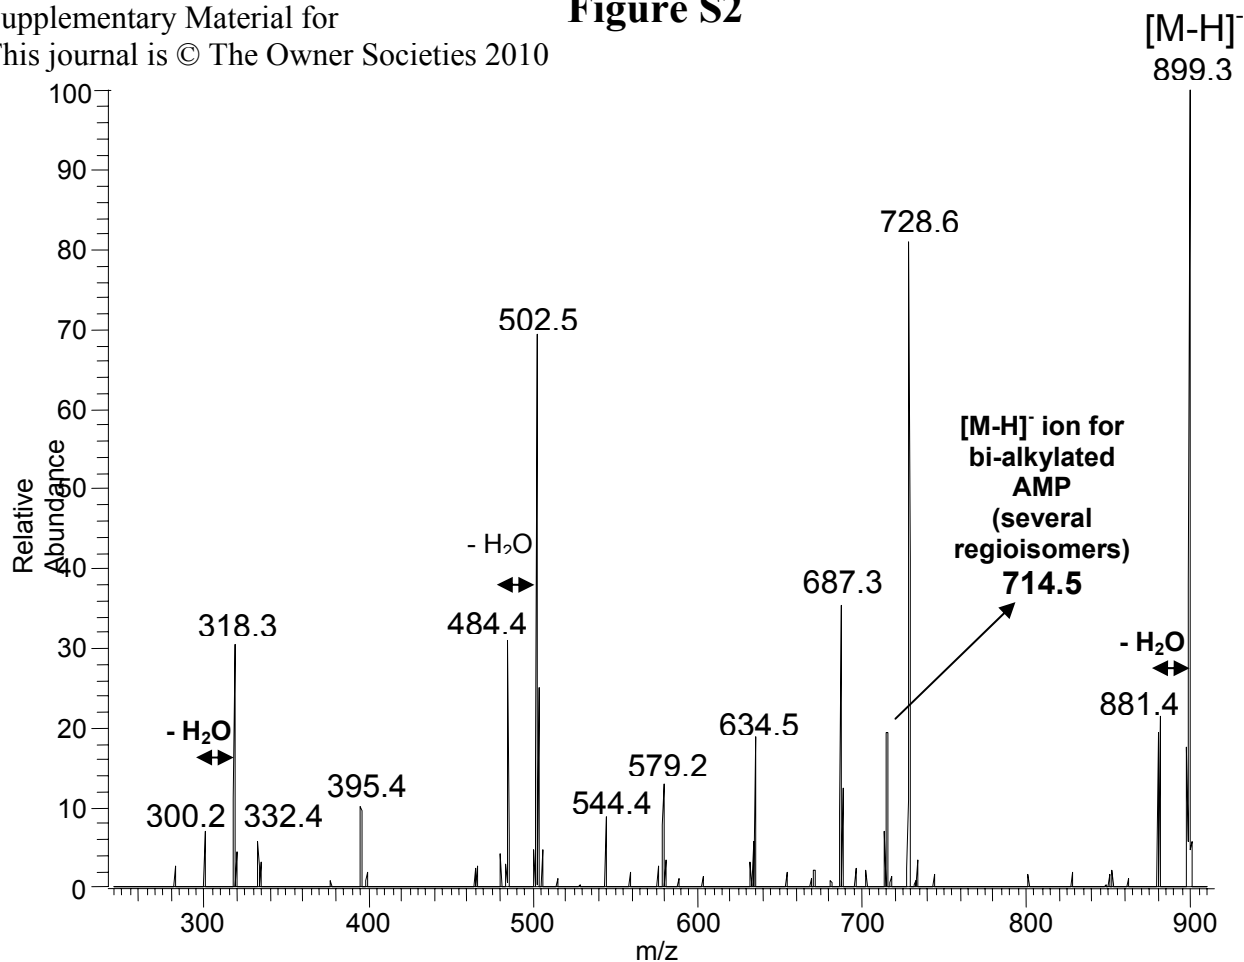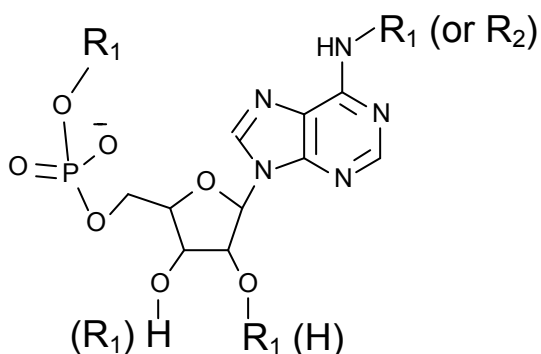

899.3

728.6 (one of the R<sub>1</sub> groups replaced by a CH<sub>3</sub>)

544.4 (one R<sub>1</sub> or R<sub>2</sub> group replaced by H and one R<sub>1</sub> group replaced by CH<sub>3</sub>)

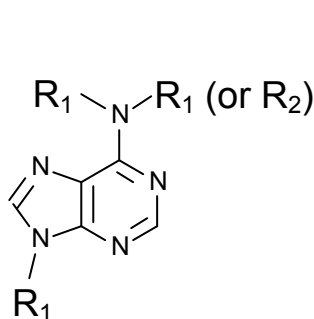

687.3

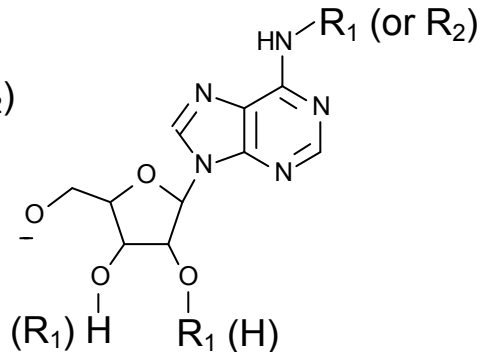

634.5

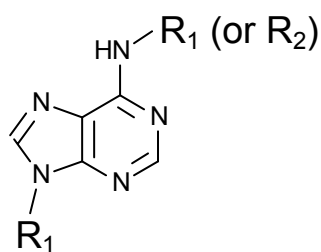

502.5

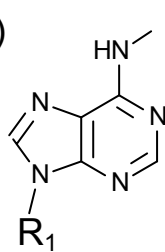

332.4

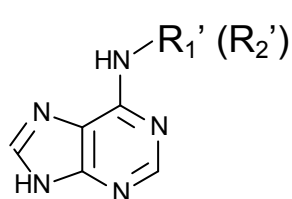

318.5

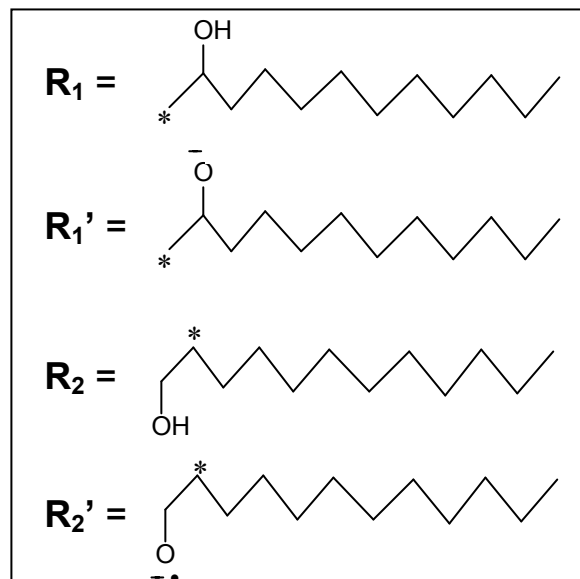

Supplement: c001781g.pdf [file c001781g.pdf]
